# Supplementary material
Source: PubMed Central journal article supplement (PMC5008201)
Supplement: TPJ-82-1061-s001.pdf [file TPJ-82-1061-s001.pdf]

***OsMIR390*-*BsaI*/*ccdB*-based (B/c) vectors for direct cloning of artificial miRNAs (amiRNAs)**

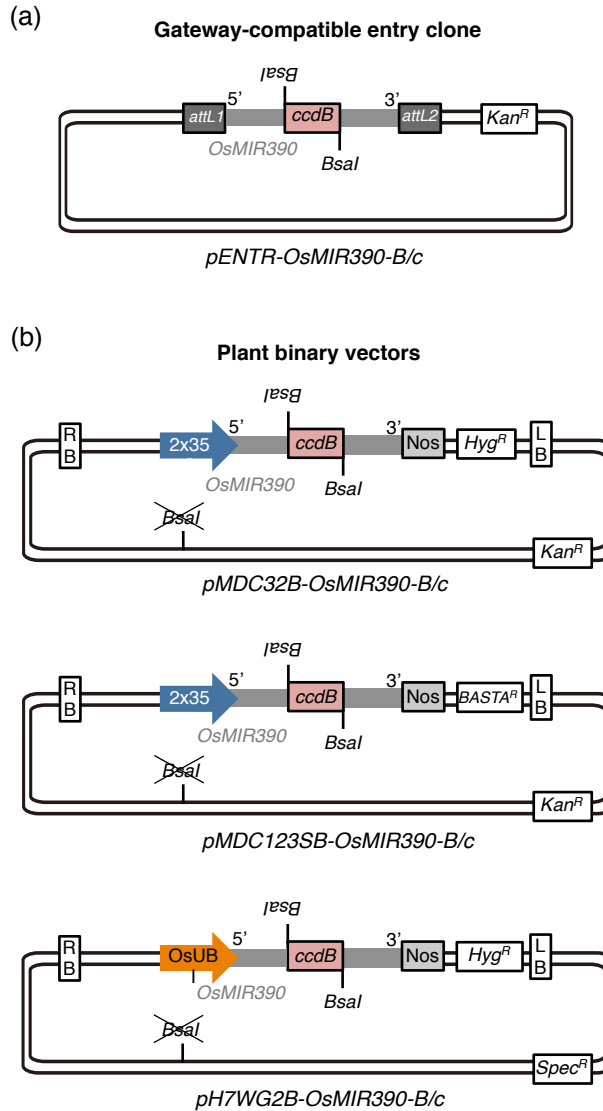

**Figure S1.** *OsMIR390*-B/c vectors for direct cloning of amiRNAs.

(a) Diagram of an *OsMIR390*-B/c Gateway-compatible entry vector (*pENTR-*OsMIR390*-B/c*).

(b) Diagrams of *OsMIR390*-B/c-based binary vectors for expression of amiRNAs in monocot species (*pMDC32B-*OsMIR390*-B/c*, *pMDC123SB-*OsMIR390*-B/c* and *pH7WG2B-*OsMIR390*-B/c*). RB: right border; 35S: *Cauliflower mosaic virus* promoter; *OsUB*: *Oryza sativa* ubiquitin 2 promoter; *BsaI*: *BsaI* recognition site, *ccdB*: gene encoding the *ccdB* toxin; LB: left border; *attL1* and *attL2*: gateway recombination sites. *Kan<sup>R</sup>*: kanamycin resistance gene; *Hyg<sup>R</sup>*: hygromycin resistance gene; *Basta<sup>R</sup>*: glufosinate resistance gene; *Spec<sup>R</sup>*: spectinomycin resistance gene. Undesired *BsaI* sites removed from the plasmid are crossed out.
