# Supplementary material
Source: PubMed Central journal article supplement (PMC5008201)
Supplement: TPJ-82-1061-s003.pdf [file TPJ-82-1061-s003.pdf]

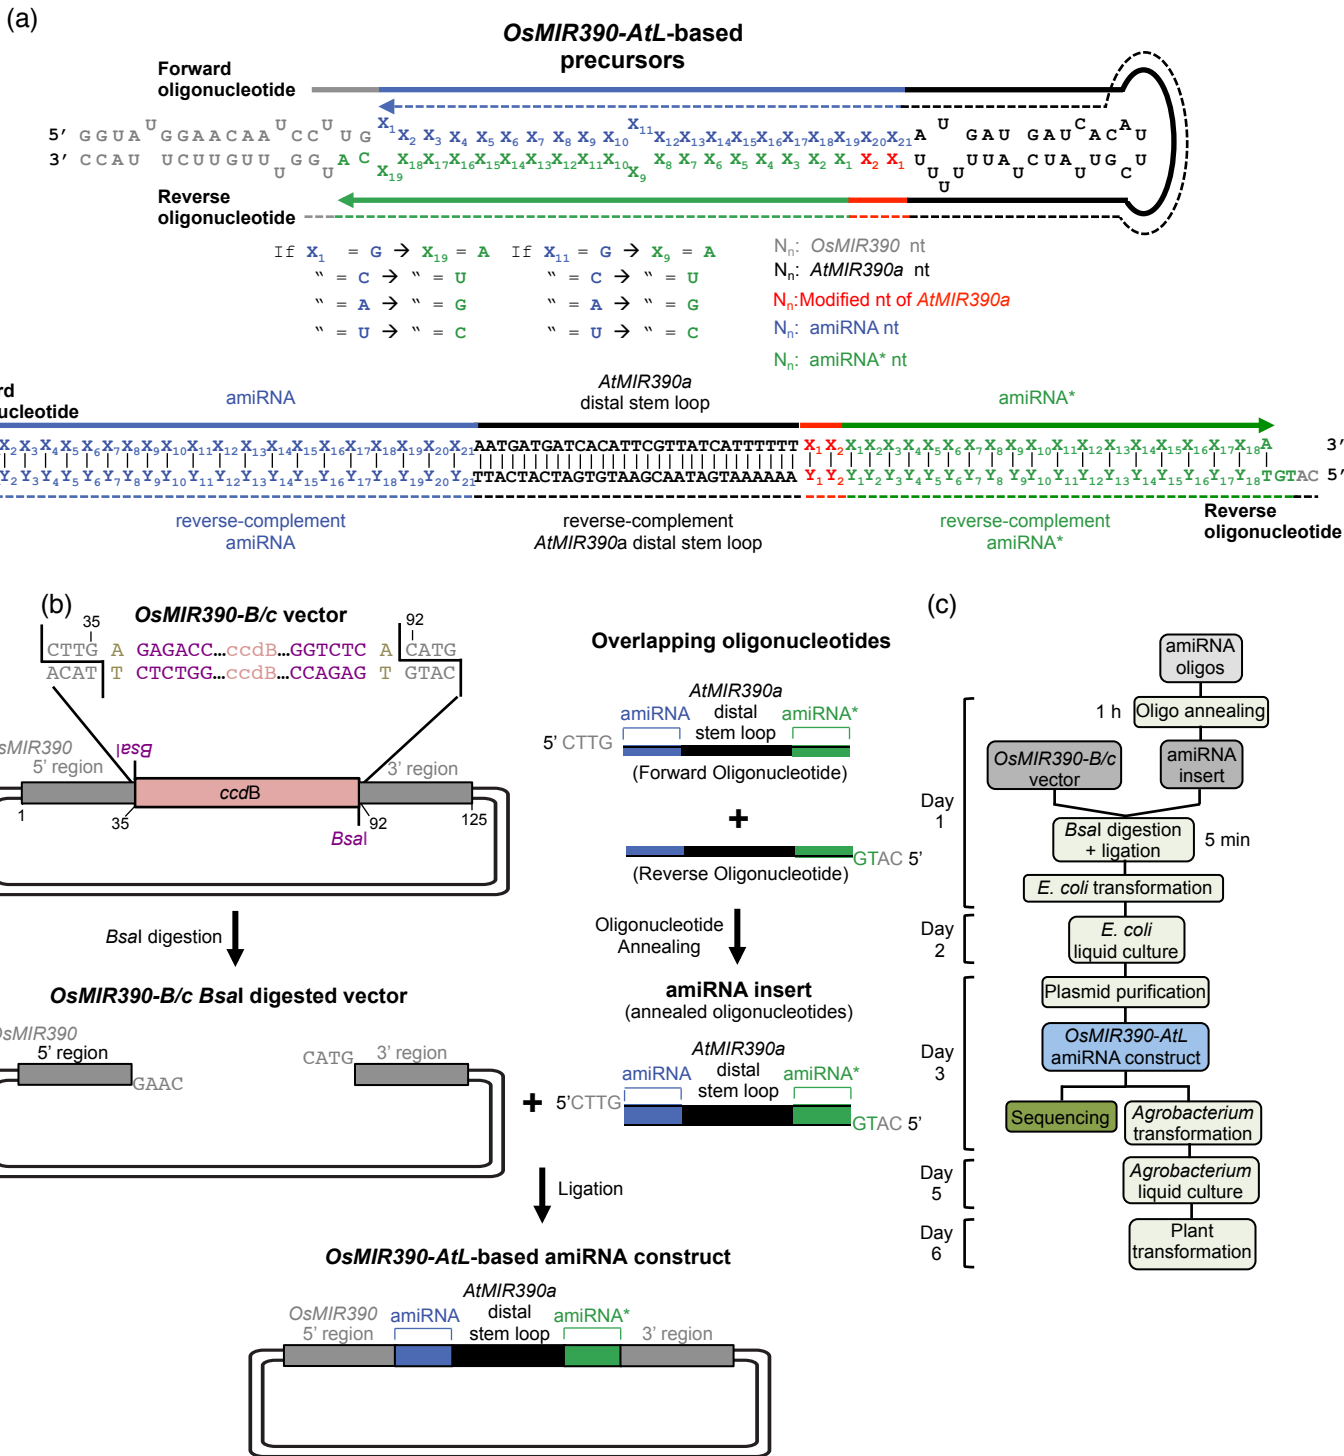

**Figure S3.** Generation of constructs to express amiRNAs from chimeric *OsMIR390-AtL* precursors.

(a) Design of the two overlapping oligonucleotides containing *OsMIR390aa* and *AtMIR390a* basal stem and distal stem loop sequences, respectively. Sequences covered by the forward and reverse oligonucleotides are represented with solid and dotted lines, respectively. Nucleotides of *AtMIR390a* and *OsMIR390* precursors are in black and grey, respectively. Nucleotides of the amiRNA guide strand, and amiRNA\* strand are in blue, and green respectively. Other *OsMIR390* nucleotides that may be modified for preserving authentic *OsMIR390* precursor secondary structure are in red. Rules for assigning identity to positions 1 and 9 of amiRNA\* are indicated.

**Figure S3 (Cont.)** (b) Diagram of the steps for generating constructs for expressing amiRNAs from chimeric *OsMIR390-AtL* precursors. The amiRNA insert obtained after annealing the two overlapping oligonucleotides has 5'CTTG and 5'CATG overhangs and is directly inserted in a directional manner into an *OsMIR390-B/c* vector previously linearized with *BsaI*. Nucleotides of the *BsaI* sites and those arbitrarily chosen and used as spacers between the *BsaI* recognition sites and the *OsMIR390* sequence are in purple and light brown, respectively. Other details are as described in (a).

(c) Flow chart of the steps from amiRNA construct generation to plant transformation.
