# Supplementary material
Source: PubMed Central journal article supplement (PMC5008201)
Supplement: TPJ-82-1061-s005.pdf [file TPJ-82-1061-s005.pdf]

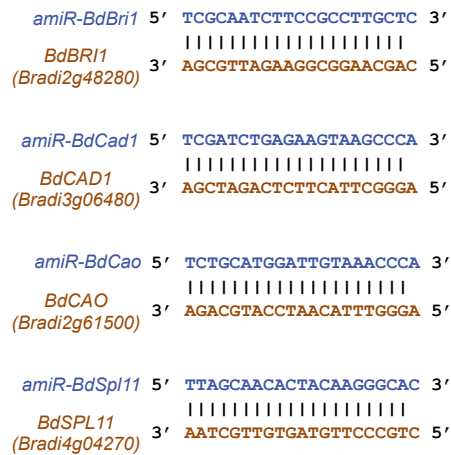

**Figure S5.** Base-pairing of amiRNAs and Brachyopodium target mRNAs. amiRNA and mRNA target nucleotides are in blue and brown, respectively.
