# Supplementary material
Source: PubMed Central journal article supplement (PMC5008201)
Supplement: TPJ-82-1061-s006.pdf [file TPJ-82-1061-s006.pdf]

**Quantification of amiR-BdBri1-induced phenotype  
in *Brachypodium* T0 transgenic plants**

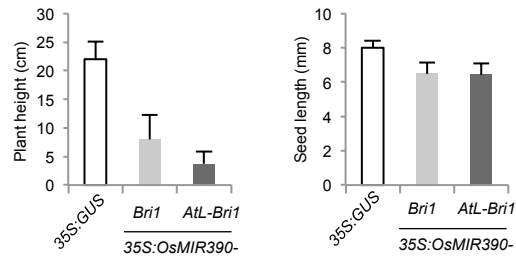

**Figure S6.** Plant height and seed length analyses in *Brachypodium distachyon* T0 transgenic plants expressing amiR-BdBri1 from authentic *OsMIR390* or chimeric *OsMIR390-AtL* precursors.
