# Supplementary material
Source: PubMed Central journal article supplement (PMC5008201)
Supplement: TPJ-82-1061-s010.pdf [file TPJ-82-1061-s010.pdf]

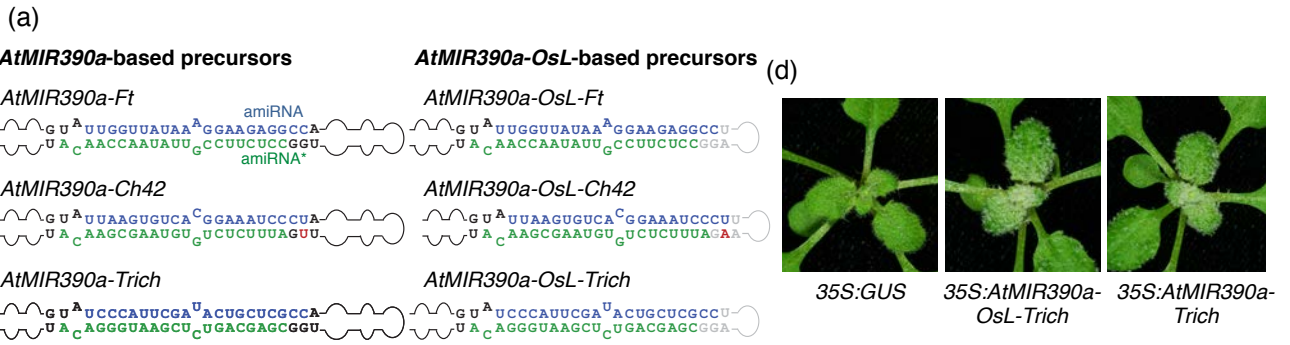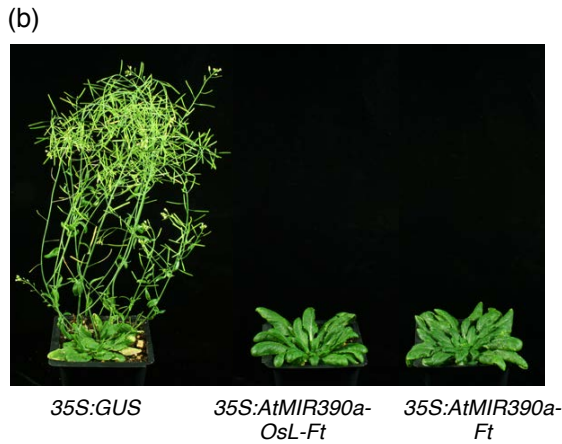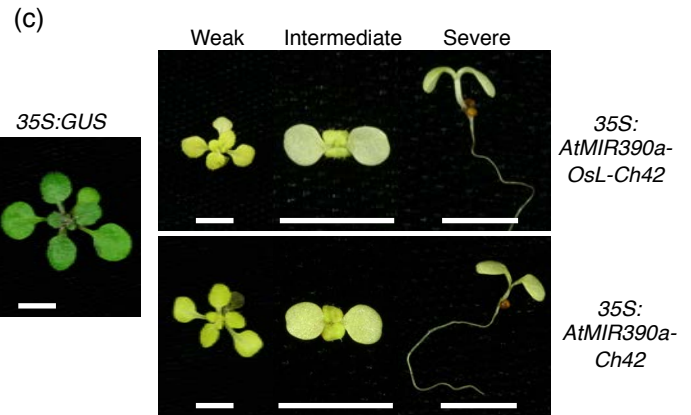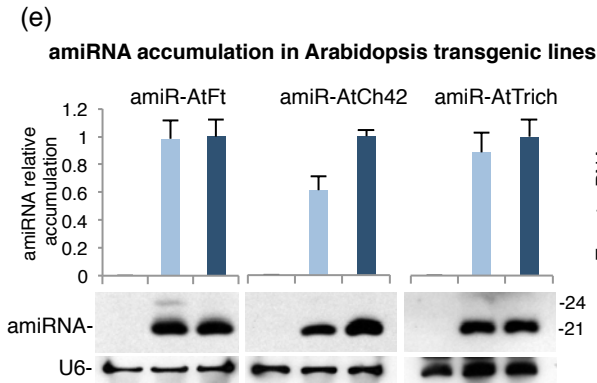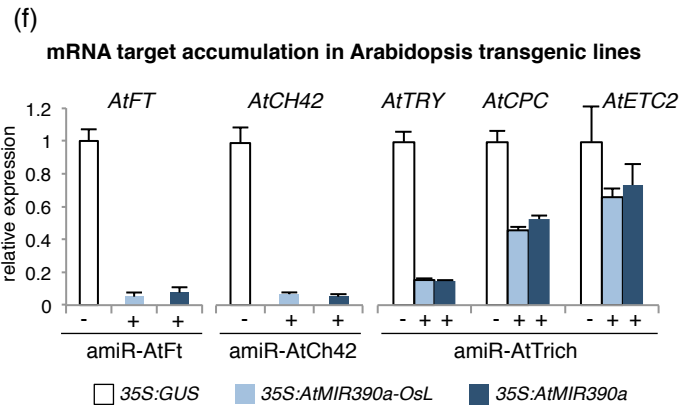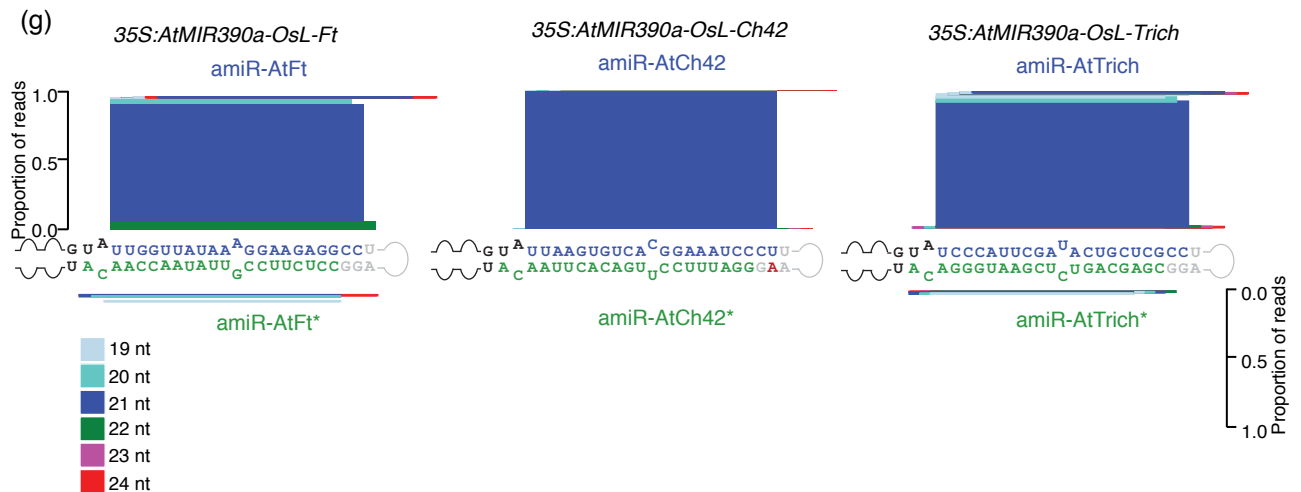

**Figure S10.** Functionality in Arabidopsis T1 transgenic plants of amiRNAs derived from *AtMIR390a*-based chimeric precursors containing *Oryza sativa* distal stem-loop sequences (*AtMIR390a-OsL*).

(a) *AtMIR390a*- and *AtMIR390a-OsL*-based precursors containing Ft-, Ch42- and Trich-amiRNAs. Nucleotides corresponding to the miRNA guide and miRNA\* strands are in blue and green, respectively; nucleotides from the *AtMIR390a* or *OsMIR390* precursors are in black or grey, respectively, except those that were modified to preserve authentic *AtMIR390a* or *OsMIR390* precursor secondary structures that are in red.

(b-d) Representative images of plants expressing amiRNAs from *AtMIR390a-OsL* or *AtMIR390a-OsL* precursors.

(b) Adult control plant (*35S:GUS*) or plants expressing *35S:AtMIR390a-Ft-OsL* or *35S:AtMIR390a-Ft* plant with a delayed flowering phenotype.

(c) Ten days-old seedlings expressing *35S:AtMIR390a-OsL-Ch42* or *35S:AtMIR390a-Ch42* and showing bleaching phenotypes.

(d) Fifteen days-old control seedling (*35S:GUS*), or seedling expressing *35S:AtMIR390a-OsL-Trich* or *35S:AtMIR390a-Trich* with increased number of trichomes.

(e) Accumulation of amiRNAs in transgenic plants. One blot from three biological replicates is shown. Each biological replicate is a pool of at least 8 independent plants. U6 RNA blot is shown as a loading control.

(f) Mean relative level  $\pm$  s.e. of *A. thaliana* *FT*, *CH42*, *TRY*, *CPC* and *ETC2* mRNAs after normalization to *ACT2*, *CPB20*, *SAND* and *UBQ10*, as determined by quantitative real-time RT-PCR (*35S:GUS* = 1.0 in all comparisons).

(g) Mapping of amiRNA reads from *AtMIR390a-OsL* precursors expressed in transgenic plants. Analysis of amiRNA and amiRNA\* reads in plants expressing amiR-AtFt (left), amiR-AtCh42 (center) and amiR-AtTrich (right), respectively. amiRNA guide and amiRNA\* strands are highlighted in blue and green, respectively. Nucleotides from *AtMIR390a* or *OsMIR390* precursors are in black and grey, respectively, except those that were modified to preserve the corresponding authentic precursor secondary structure that are in red. Proportion of small RNA reads are plotted as stacked bar graphs. Small RNAs are color-coded by size
