# Supplementary material
Source: PubMed Central journal article supplement (PMC5008201)
Supplement: TPJ-82-1061-s011.pdf [file TPJ-82-1061-s011.pdf]

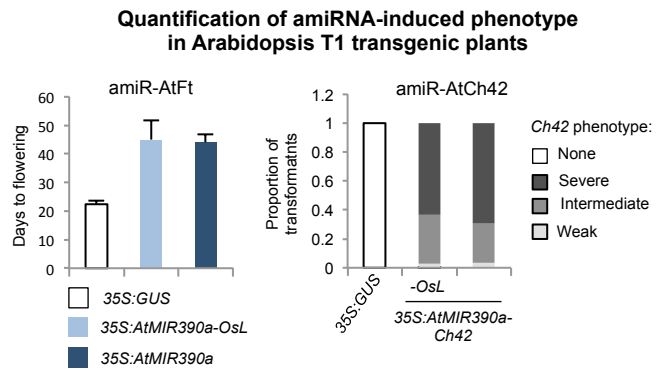

**Figure S11.** Quantification of amiRNA-induced phenotypes in Arabidopsis transgenic plants expressing amiR-AtFt (left) and amiR-AtCh42 (right) from *AtMIR390a* or chimeric *AtMIR390a-OsL* precursors.
