# Supplementary material
Source: PubMed Central journal article supplement (PMC5008201)
Supplement: TPJ-82-1061-s012.pdf [file TPJ-82-1061-s012.pdf]

**Target accumulation in Brachypodium 70 transgenic plants  
(RNA-Seq)**

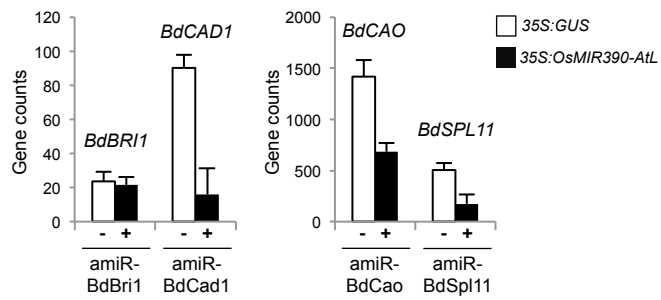

**Figure S12.** Target accumulation determined by RNA-Seq analysis in transgenic Brachypodium plants including *35S:OsMIR390-AtL*-based or *35S:GUS* constructs.
